# Supplementary material for: Balloon-borne Stratospheric Vertical Profiling of Carbonyl Sulfide and Evaluation of Ozone Scrubbers
Source: Copernicus journal article supplement (doi:10.5194/egusphere-2025-3079), 2025-07-18
Supplement: Supplementary file 1 [file egusphere-2025-3079-supplement.pdf]

# Supplement to Balloon-borne Stratospheric Vertical Profiling of Carbonyl Sulfide and Evaluation of Ozone Scrubbers

Alessandro Zanchetta et al.

*Correspondence to:* Huilin Chen (huilin.chen@rug.nl, huilin.chen@nju.edu.cn)

## 5 S1 Tests on gas species removal due to O<sub>3</sub> scrubbers

The effects of different O<sub>3</sub> scrubbers on COS and O<sub>3</sub>, tested on tropospheric compressed air, are shown in Fig. S1 and S2. The p-values of the ANOVA test for each species are reported in Table S1 and Table S2.

When O<sub>3</sub> was not generated, none of the two scrubbers showed significant differences with the bypass channel neither for COS, nor for O<sub>3</sub>. Clearly, the O<sub>3</sub> scrubbing was performed quantitatively by the squalene-based scrubber, while the cotton-  
10 based one was likely saturated and could not remove the vast majority of the produced ozone. When O<sub>3</sub> was produced in the UV lamp, we measured higher COS molar fractions both with cotton and with squalene. We believe this is due to oxidation of other compounds (e.g., CS<sub>2</sub>, DMS) in presence of UV radiation, and not due to the scrubbers themselves. The higher uncertainty for the tests with squalene is due to some spectroscopical effects that affected the instrument precision during part of the tests (not shown). Either way, no sign of negative biases on COS was measured for either of the two scrubbers.

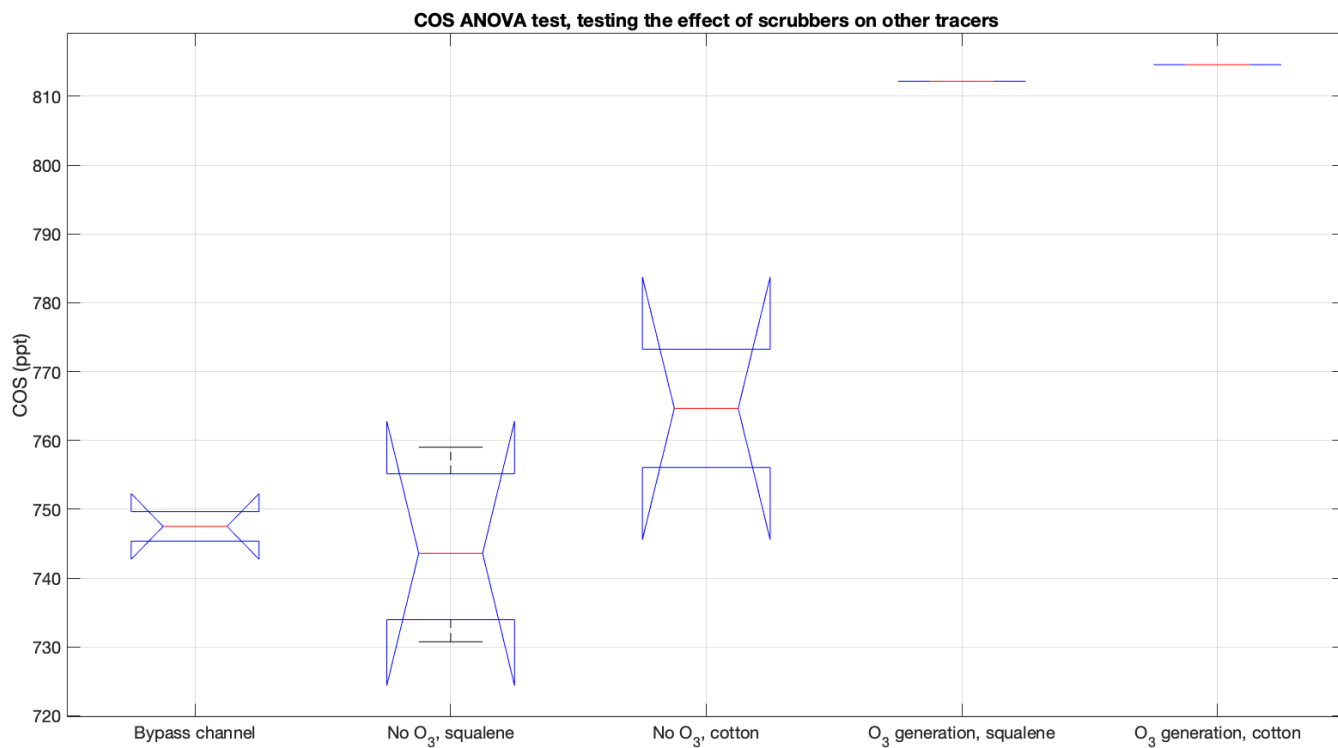

**Figure S1: effects of different ozone scrubbers on COS.**

**Table S1: p-values resulting from the ANOVA test for COS molar fractions in the tracer removal tests. The p-values = 0 are due to a comparison between single measurements, therefore no standard deviation can be computed.**

| COS                                       | Bypass channel | No O <sub>3</sub> , squalene | No O <sub>3</sub> , cotton | O <sub>3</sub> generation, squalene | O <sub>3</sub> generation, cotton |
|-------------------------------------------|----------------|------------------------------|----------------------------|-------------------------------------|-----------------------------------|
| <b>Bypass channel</b>                     |                | 0.792997793                  | 0.192430962                | 0.036612983                         | 0.0353083                         |
| <b>No O<sub>3</sub>, squalene</b>         | 0.792997793    |                              | 0.199969975                | 0.053576395                         | 0.050245879                       |
| <b>No O<sub>3</sub>, cotton</b>           | 0.192430962    | 0.199969975                  |                            | 0.193251053                         | 0.184500858                       |
| <b>O<sub>3</sub> generation, squalene</b> | 0.036612983    | 0.053576395                  | 0.193251053                |                                     | 0                                 |
| <b>O<sub>3</sub> generation, cotton</b>   | 0.0353083      | 0.050245879                  | 0.184500858                | 0                                   |                                   |

20

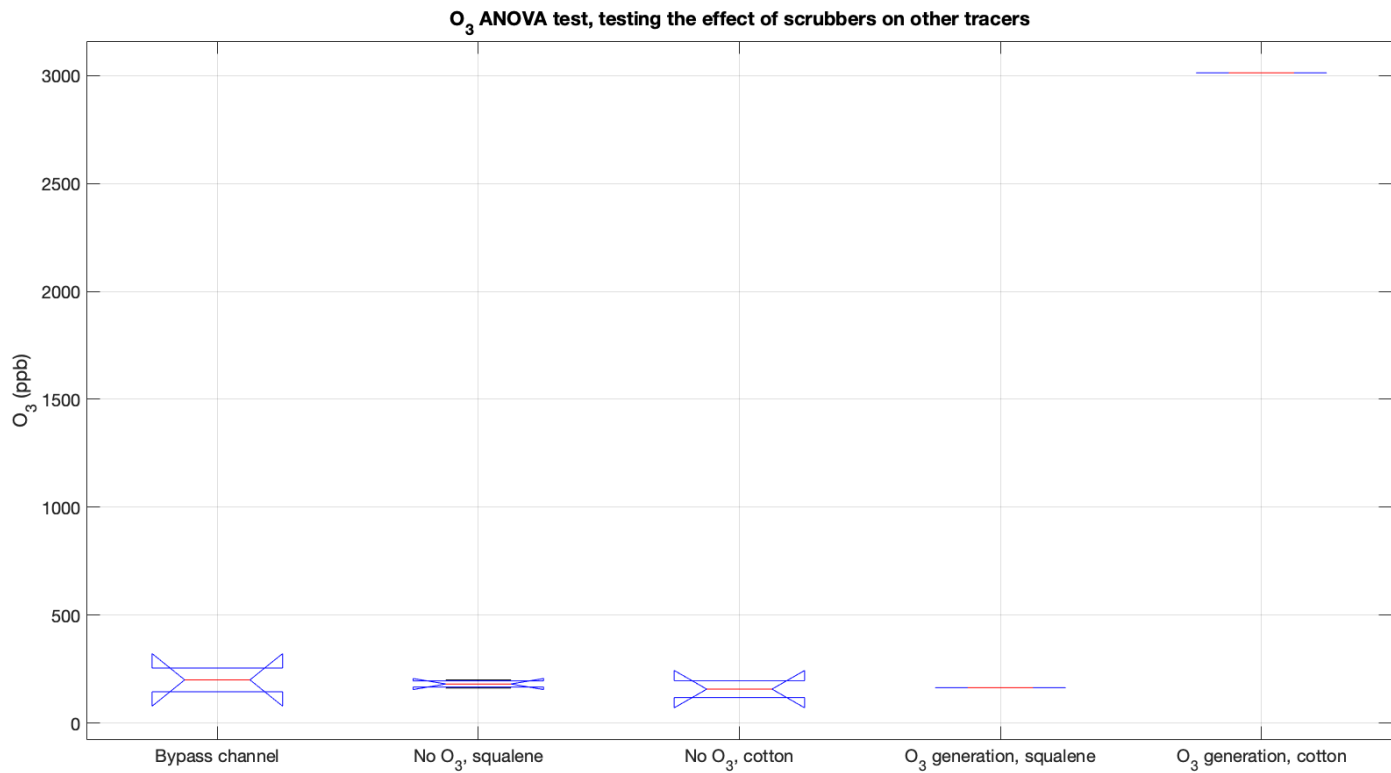

Figure S2: effects of different ozone scrubber on O<sub>3</sub>.

Table S2: p-values resulting from the ANOVA test for O<sub>3</sub> molar fractions in the tracer removal tests. The p-values = 0 are due to a comparison between single measurements, therefore no standard deviation can be computed.

| O <sub>3</sub>                      | Bypass channel | No O <sub>3</sub> , squalene | No O <sub>3</sub> , cotton | O <sub>3</sub> generation, squalene | O <sub>3</sub> generation, cotton |
|-------------------------------------|----------------|------------------------------|----------------------------|-------------------------------------|-----------------------------------|
| Bypass channel                      |                | 0.691559115                  | 0.588818228                | 0.768190602                         | 0.021501555                       |
| No O <sub>3</sub> , squalene        | 0.691559115    |                              | 0.510877137                | 0.510592973                         | 5.93333E-05                       |
| No O <sub>3</sub> , cotton          | 0.588818228    | 0.510877137                  |                            | 0.936761332                         | 0.015074124                       |
| O <sub>3</sub> generation, squalene | 0.768190602    | 0.510592973                  | 0.936761332                |                                     | 0                                 |
| O <sub>3</sub> generation, cotton   | 0.021501555    | 5.93333E-05                  | 0.015074124                | 0                                   |                                   |

25

**S2 p-values from ANOVA test on stratospheric-mimicking gas mixture**

Figures S3-S6 and their relative Table S3-S6 illustrate the results of the ANOVA tests on the other tracers measured by the QCLS. CO, similarly to COS, seem to be produced during the O<sub>3</sub> generation. The other tracers seem to be affected by O<sub>3</sub> and by squalene only marginally, with their ANOVA tests resulting in non-significant differences.

30

Table S7 and S8 report the p-values related to the ANOVA tests depicted in Fig. 3 and 4 in the main text, respectively.

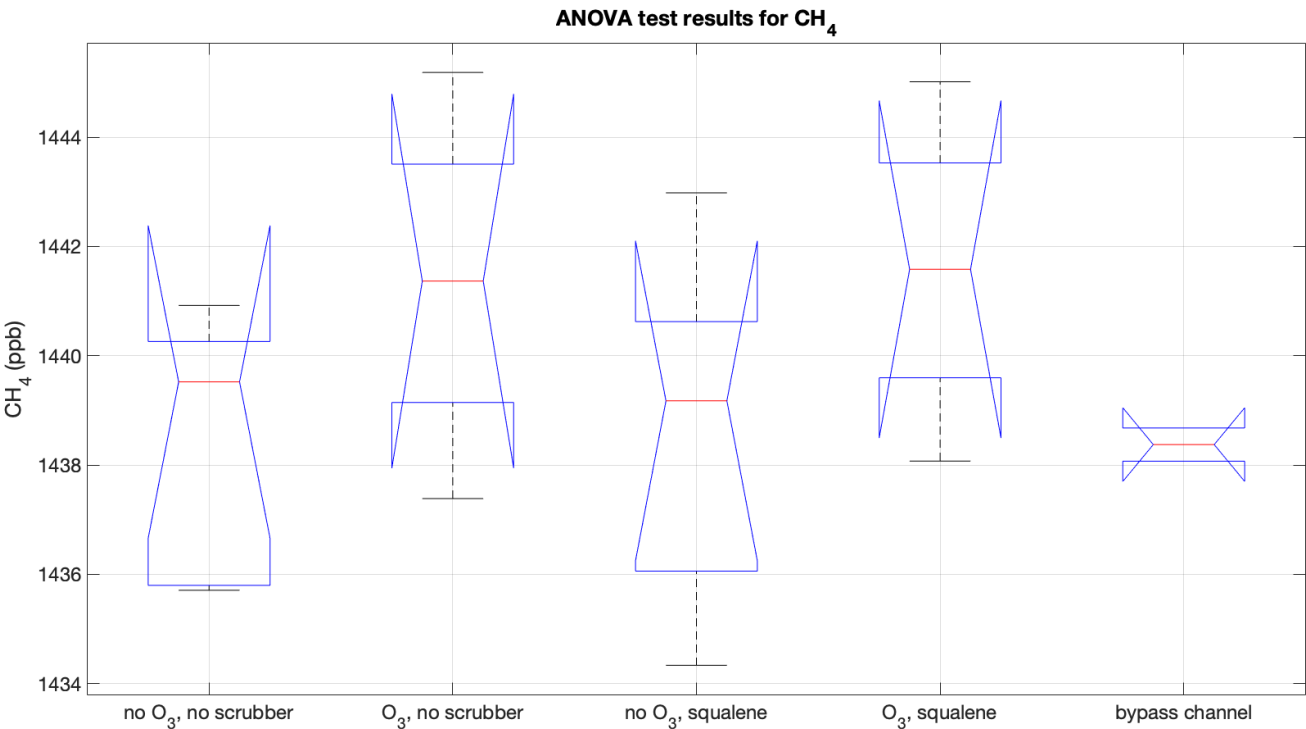

**Figure S3: ANOVA test representation for CH<sub>4</sub>.**

**Table S3: p-values resulting from the ANOVA test for CH<sub>4</sub> molar fractions.**

| CH <sub>4</sub>                        | No O <sub>3</sub> , no scrubber | O <sub>3</sub> generation, no scrubber | No O <sub>3</sub> , squalene | O <sub>3</sub> generation, squalene | Bypass channel |
|----------------------------------------|---------------------------------|----------------------------------------|------------------------------|-------------------------------------|----------------|
| No O <sub>3</sub> , no scrubber        |                                 | 0.155378193                            | 0.949217256                  | 0.108066673                         | 0.88969152     |
| O <sub>3</sub> generation, no scrubber | 0.155378193                     |                                        | 0.236982215                  | 0.915871475                         | 0.288201694    |
| No O <sub>3</sub> , squalene           | 0.949217256                     | 0.236982215                            |                              | 0.184145628                         | 0.885169195    |
| O <sub>3</sub> generation, squalene    | 0.108066673                     | 0.915871475                            | 0.184145628                  |                                     | 0.212687552    |
| Bypass channel                         | 0.88969152                      | 0.288201694                            | 0.885169195                  | 0.212687552                         |                |

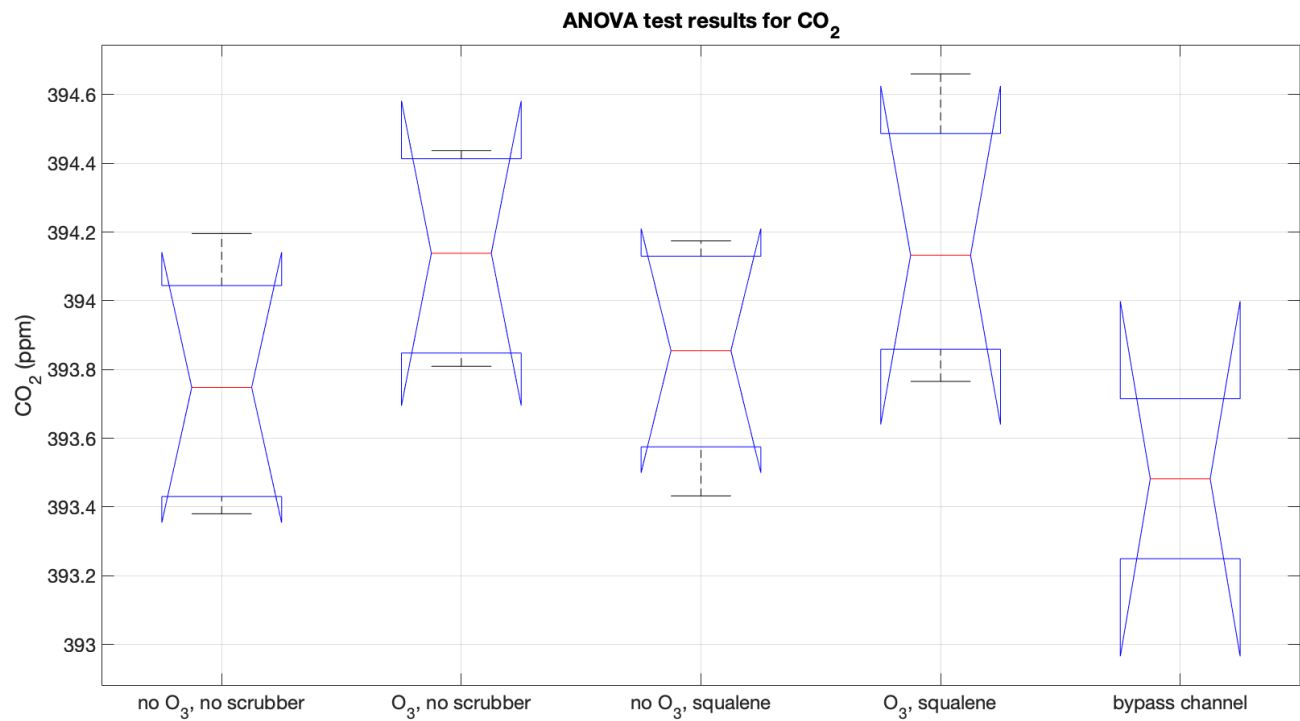

**Figure S4: ANOVA test representation for CO<sub>2</sub>.**

**Table S4: p-values resulting from the ANOVA test for CO<sub>2</sub> molar fractions.**

| CO <sub>2</sub>                        | No O <sub>3</sub> , no scrubber | O <sub>3</sub> generation, no scrubber | No O <sub>3</sub> , squalene | O <sub>3</sub> generation, squalene | Bypass channel |
|----------------------------------------|---------------------------------|----------------------------------------|------------------------------|-------------------------------------|----------------|
| No O <sub>3</sub> , no scrubber        |                                 | 0.120593543                            | 0.674240248                  | 0.111410702                         | 0.351443899    |
| O <sub>3</sub> generation, no scrubber | 0.120593543                     |                                        | 0.178580774                  | 0.875554317                         | 0.084883879    |
| No O <sub>3</sub> , squalene           | 0.674240248                     | 0.178580774                            |                              | 0.161549618                         | 0.200493163    |
| O <sub>3</sub> generation, squalene    | 0.111410702                     | 0.875554317                            | 0.161549618                  |                                     | 0.104353378    |
| Bypass channel                         | 0.351443899                     | 0.084883879                            | 0.200493163                  | 0.104353378                         |                |

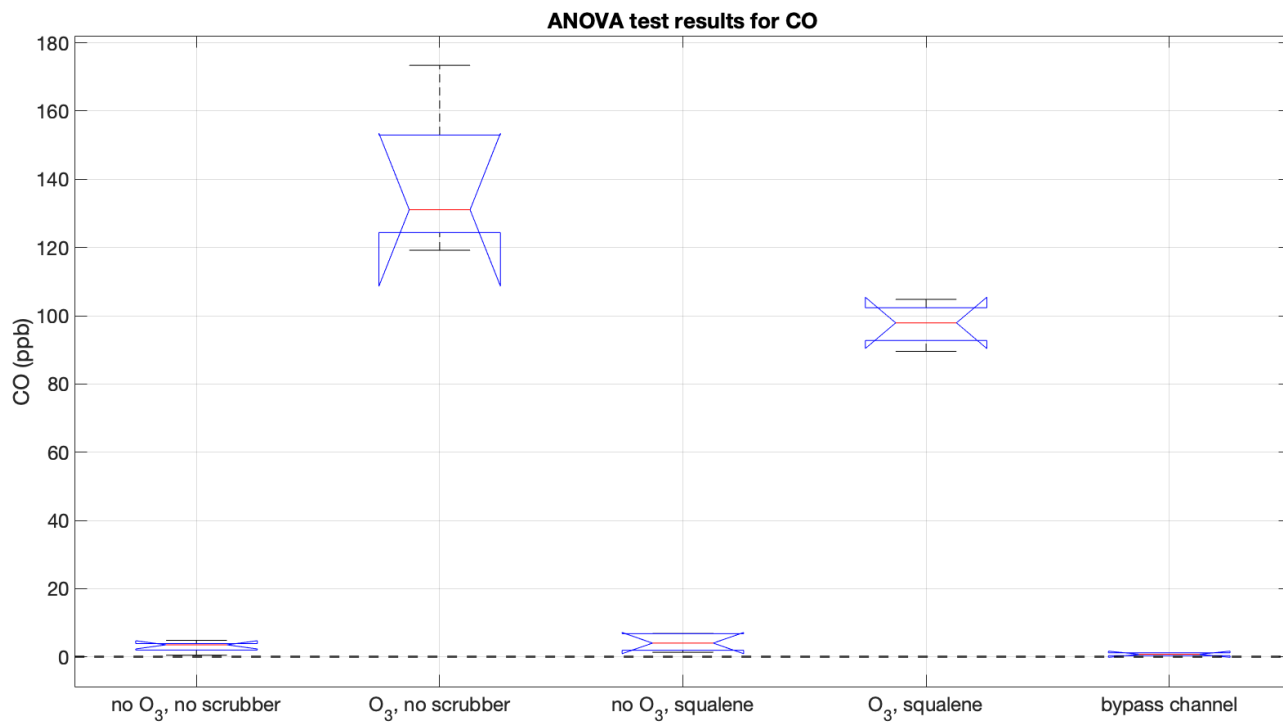

**Figure S5: ANOVA test representation for CO.**

**Table S5: p-values resulting from the ANOVA test for CO molar fractions.**

| CO                                     | No O <sub>3</sub> , no scrubber | O <sub>3</sub> generation, no scrubber | No O <sub>3</sub> , squalene | O <sub>3</sub> generation, squalene | Bypass channel |
|----------------------------------------|---------------------------------|----------------------------------------|------------------------------|-------------------------------------|----------------|
| No O <sub>3</sub> , no scrubber        |                                 | 5.44265E-07                            | 0.382133147                  | 4.43905E-10                         | 0.100030491    |
| O <sub>3</sub> generation, no scrubber | 5.44265E-07                     |                                        | 6.06495E-07                  | 0.015757839                         | 0.001519548    |
| No O <sub>3</sub> , squalene           | 0.382133147                     | 6.06495E-07                            |                              | 8.38815E-10                         | 0.123950163    |
| O <sub>3</sub> generation, squalene    | 4.43905E-10                     | 0.015757839                            | 8.38815E-10                  |                                     | 3.69703E-05    |
| Bypass channel                         | 0.100030491                     | 0.001519548                            | 0.123950163                  | 3.69703E-05                         |                |

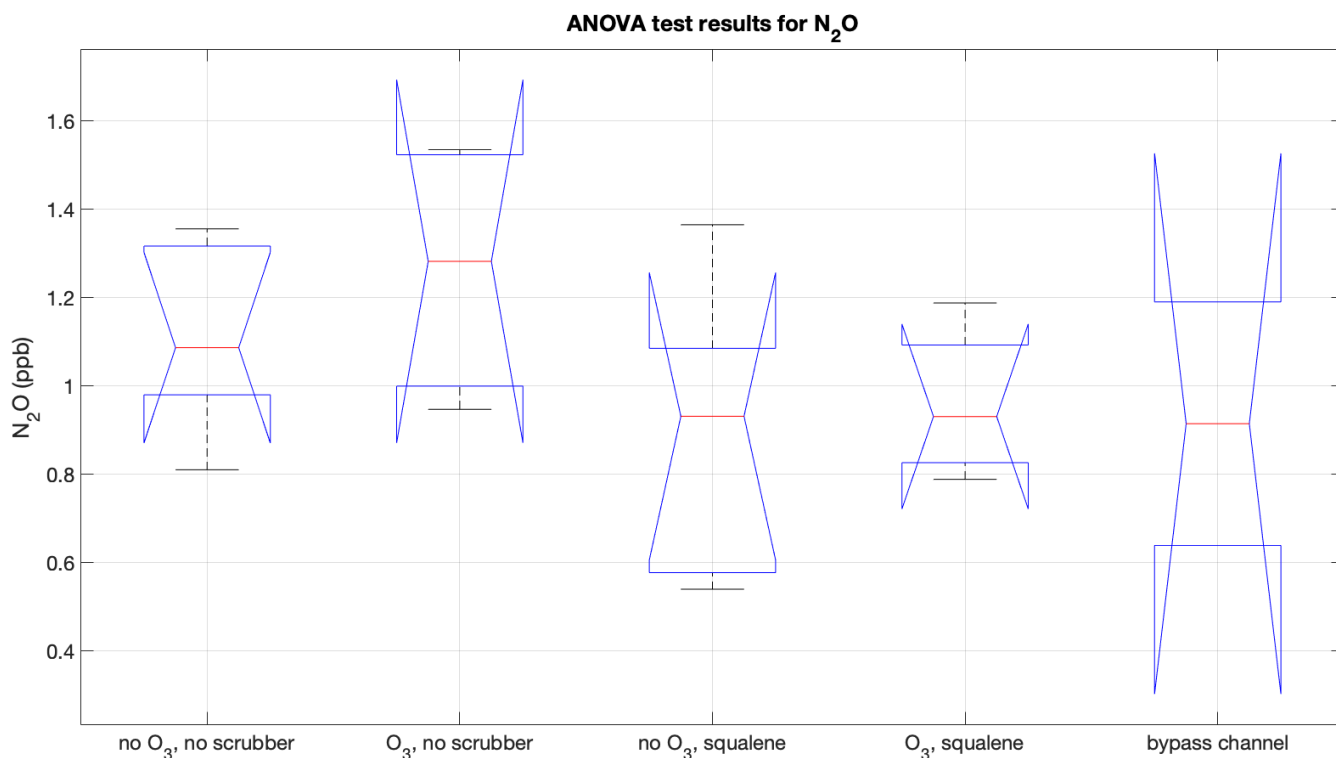

45 **Figure S6: ANOVA test representation for N<sub>2</sub>O.**

**Table S6: p-values resulting from the ANOVA test for N<sub>2</sub>O molar fractions.**

| N <sub>2</sub> O                       | No O <sub>3</sub> , no scrubber | O <sub>3</sub> generation, no scrubber | No O <sub>3</sub> , squalene | O <sub>3</sub> generation, squalene | Bypass channel |
|----------------------------------------|---------------------------------|----------------------------------------|------------------------------|-------------------------------------|----------------|
| No O <sub>3</sub> , no scrubber        |                                 | 0.359325384                            | 0.217409312                  | 0.277689103                         | 0.377699683    |
| O <sub>3</sub> generation, no scrubber | 0.359325384                     |                                        | 0.112412874                  | 0.137165062                         | 0.289831556    |
| No O <sub>3</sub> , squalene           | 0.217409312                     | 0.112412874                            |                              | 0.761757143                         | 0.972574391    |
| O <sub>3</sub> generation, squalene    | 0.277689103                     | 0.137165062                            | 0.761757143                  |                                     | 0.843816095    |
| Bypass channel                         | 0.377699683                     | 0.289831556                            | 0.972574391                  | 0.843816095                         |                |

**Table S7: p-values resulting from the ANOVA test for COS molar fractions (see Fig. A2 in the main text).**

| COS                             | No O <sub>3</sub> , no scrubber | O <sub>3</sub> generation, no scrubber | No O <sub>3</sub> , squalene | O <sub>3</sub> generation, squalene | Bypass channel |
|---------------------------------|---------------------------------|----------------------------------------|------------------------------|-------------------------------------|----------------|
| No O <sub>3</sub> , no scrubber |                                 | 0.00096097                             | 0.38152                      | 0.0048316                           | 0.16598        |
| O <sub>3</sub> generation,      | 0.00096097                      |                                        | 0.0090425                    | 0.028935                            | 0.028613       |

|                                           |           |           |         |           |           |
|-------------------------------------------|-----------|-----------|---------|-----------|-----------|
| <b>no scrubber</b>                        |           |           |         |           |           |
| <b>No O<sub>3</sub>, squalene</b>         | 0.38152   | 0.0090425 |         | 0.11413   | 0.92189   |
| <b>O<sub>3</sub> generation, squalene</b> | 0.0048316 | 0.028935  | 0.11413 |           | 0.0080331 |
| <b>Bypass channel</b>                     | 0.16598   | 0.028613  | 0.92189 | 0.0080331 |           |

50 Table S8: p-values resulting from the ANOVA tests for O<sub>3</sub> molar fractions (see Fig. A2 in the main text).

| <b>O<sub>3</sub></b>                         | <b>No O<sub>3</sub>, no scrubber</b> | <b>O<sub>3</sub> generation, no scrubber</b> | <b>No O<sub>3</sub>, squalene</b> | <b>O<sub>3</sub> generation, squalene</b> | <b>Bypass channel</b> |
|----------------------------------------------|--------------------------------------|----------------------------------------------|-----------------------------------|-------------------------------------------|-----------------------|
| <b>No ozone, no scrubber</b>                 |                                      | 1.0201E-09                                   | 0.55868                           | 0.56586                                   | 0.89317               |
| <b>O<sub>3</sub> generation, no scrubber</b> | 1.0201E-09                           |                                              | 3.0293E-10                        | 8.3646E-08                                | 3.3303E-05            |
| <b>No O<sub>3</sub>, squalene</b>            | 0.55868                              | 3.0293E-10                                   |                                   | 0.89497                                   | 0.72736               |
| <b>O<sub>3</sub> generation, squalene</b>    | 0.56586                              | 8.3646E-08                                   | 0.89497                           |                                           | 0.68112               |
| <b>Bypass channel</b>                        | 0.89317                              | 3.3303E-05                                   | 0.72736                           | 0.68112                                   |                       |



S3 Tropopause heights of the presented flights

Figures S7 – S15 show lapse rate and relative humidity for all flights. The tropopause height was identified following the thermal tropopause height definition by WMO (1957). For TRN1, no temperature or relative humidity data was available, therefore the tropopause height could not be identified. SOD5 (Fig. S11) shows a particularly weak tropopause, with H<sub>2</sub>O injections up to almost 15 km of altitude.

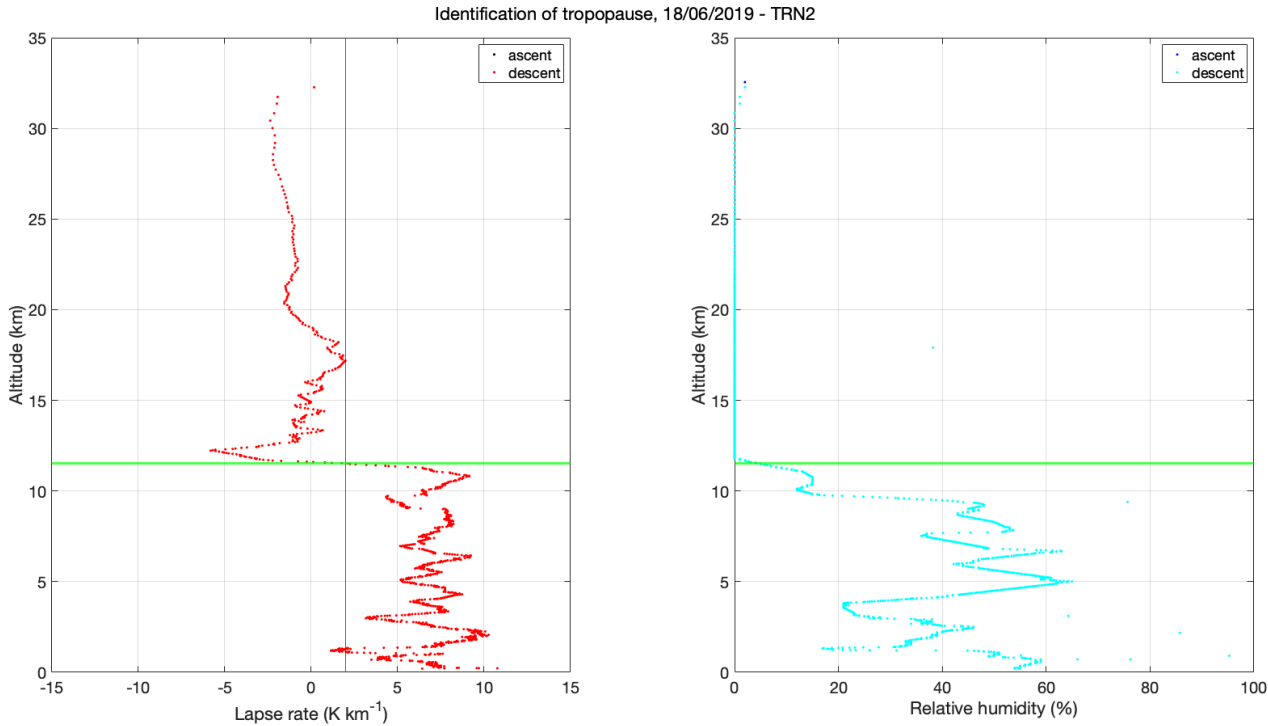

Figure S7: identification of the tropopause height for TRN2 (11.54 km).

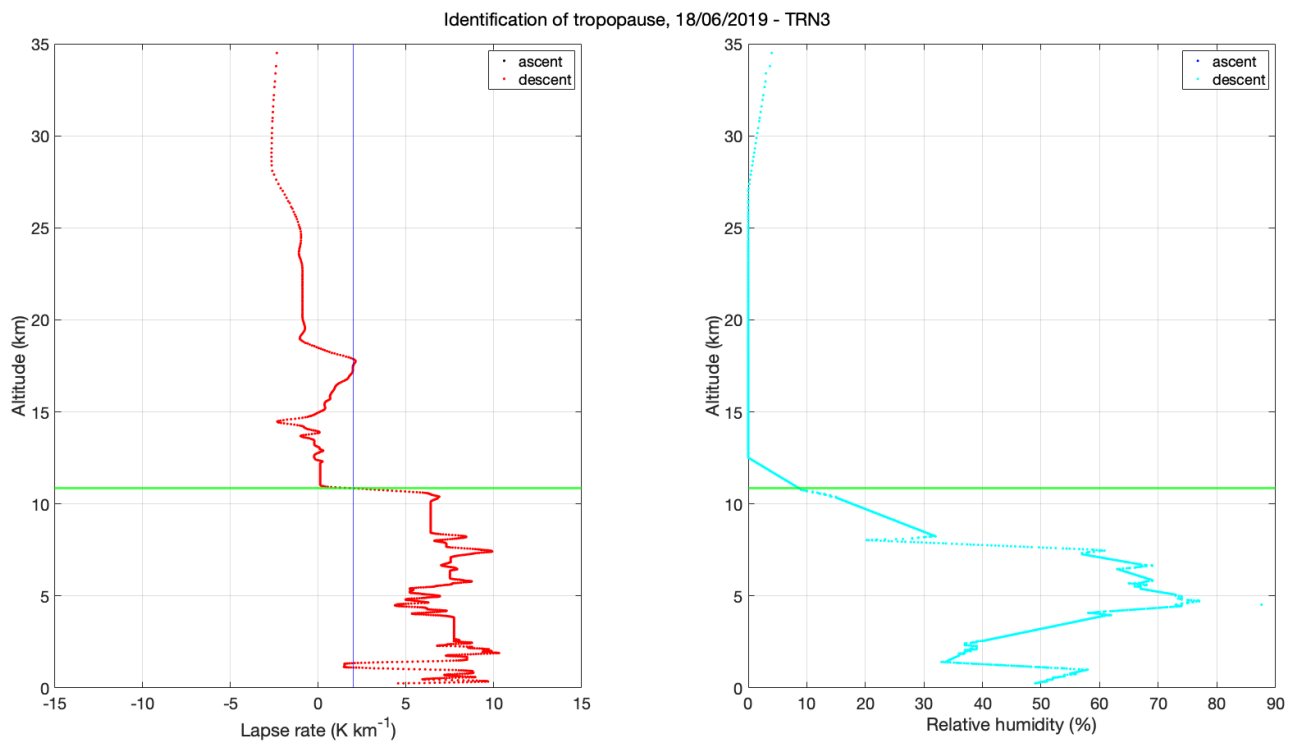

**Figure S8: identification of the tropopause height for TRN3 (10.79 km).**

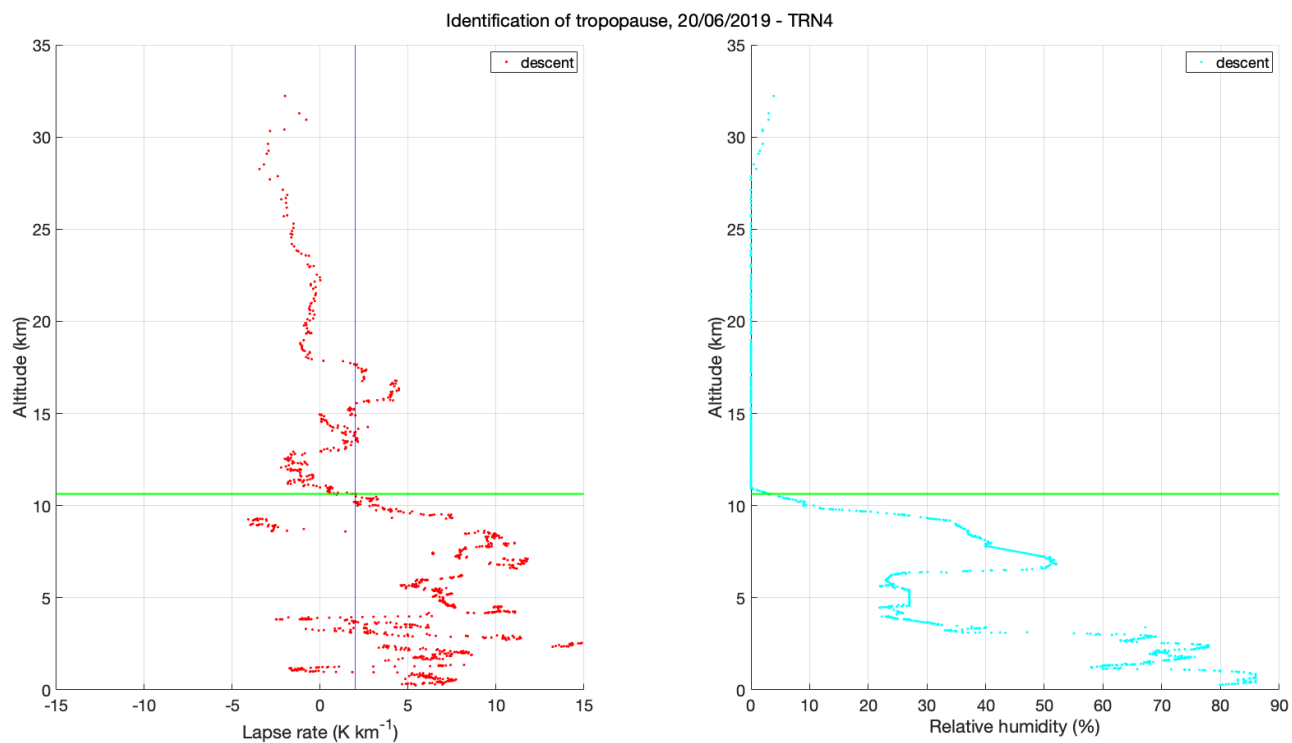

**Figure S9: identification of the tropopause height for TRN4 (10.69 km).**

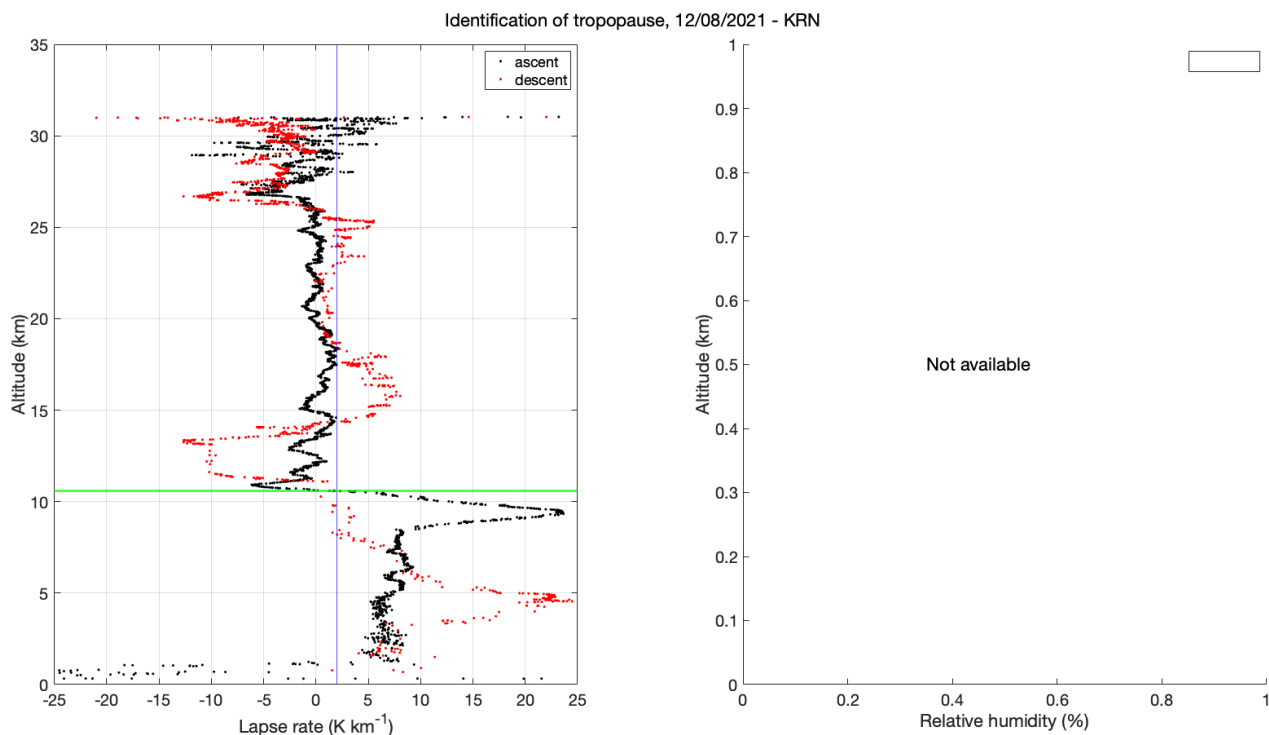

65 **Figure S10: identification of the tropopause height for KRN (10.93 km).**

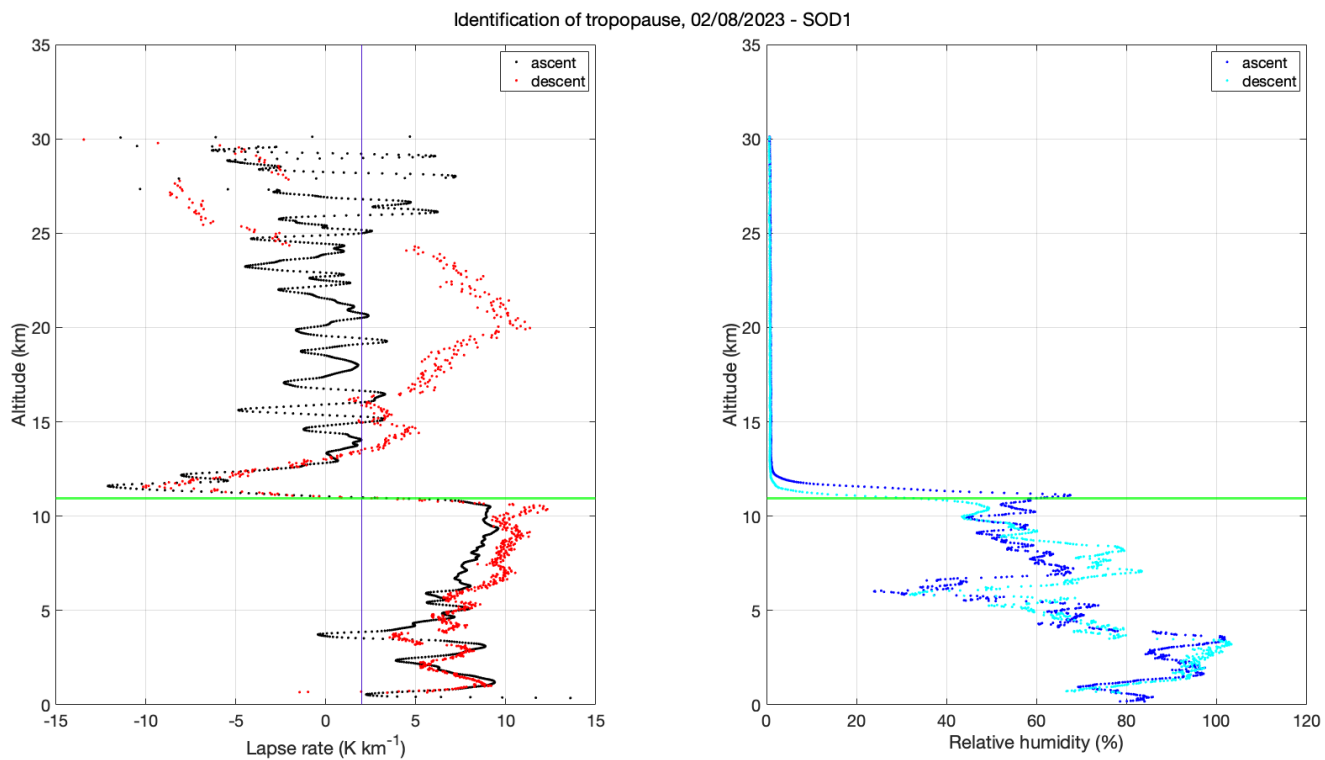

**Figure S11: identification of the tropopause height for SOD1 (10.94 km).**

Identification of tropopause, 02/08/2023 - SOD2

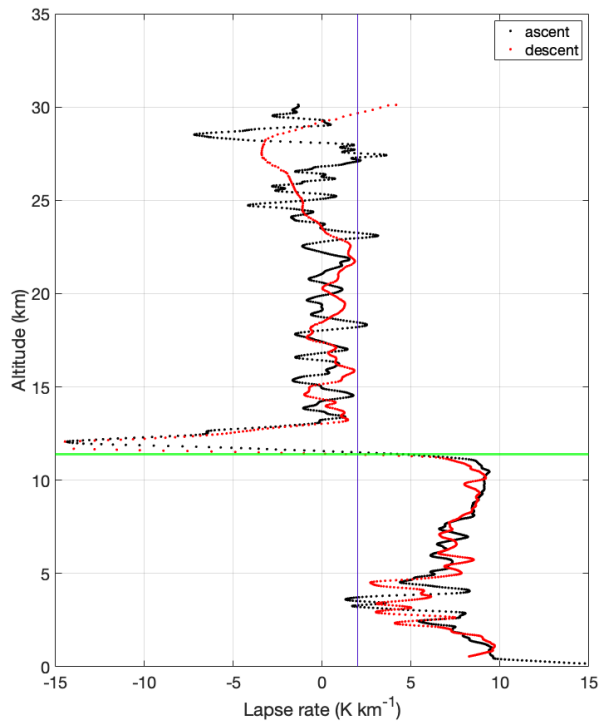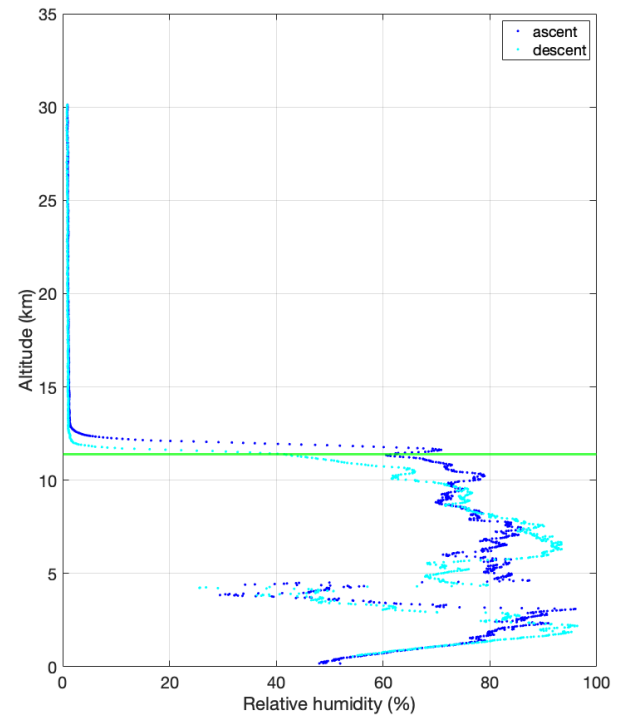

**Figure S12: identification of the tropopause height for SOD2 (11.37 km).**

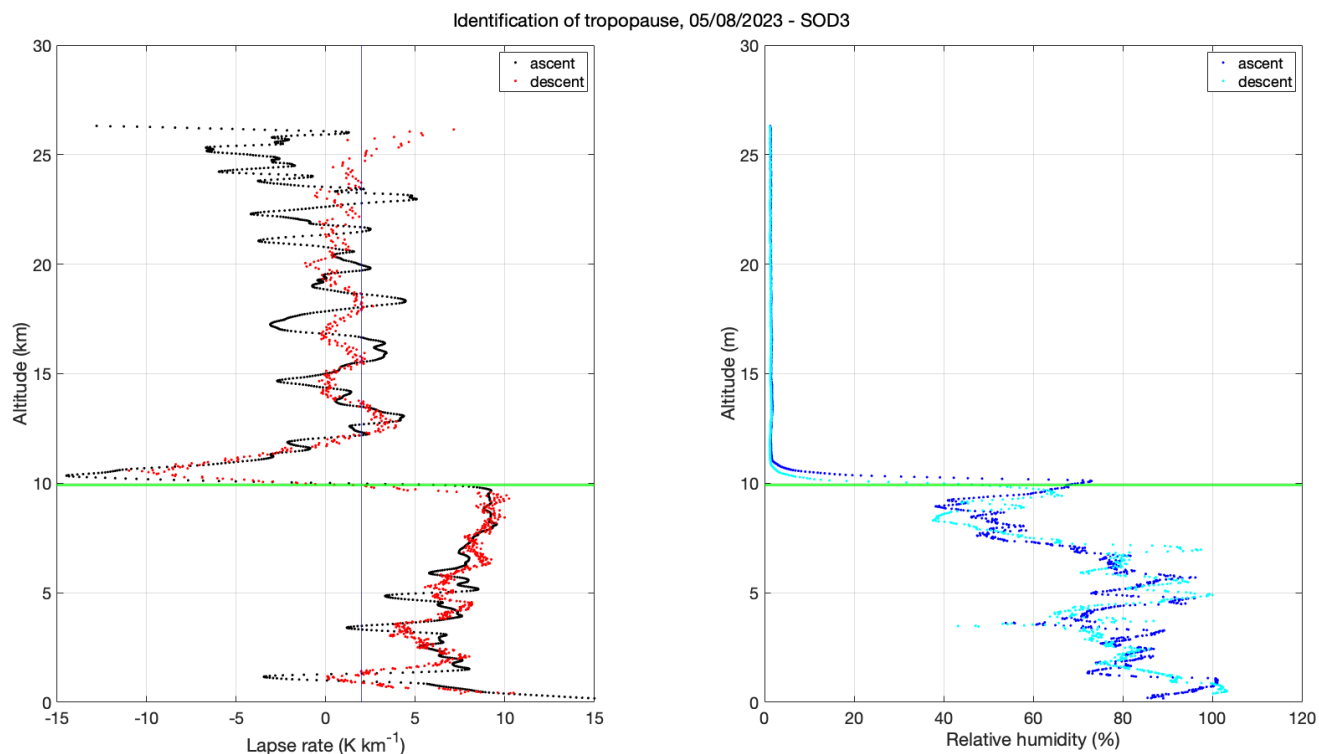

**Figure S13: identification of the tropopause height for SOD3 (9.92 km).**

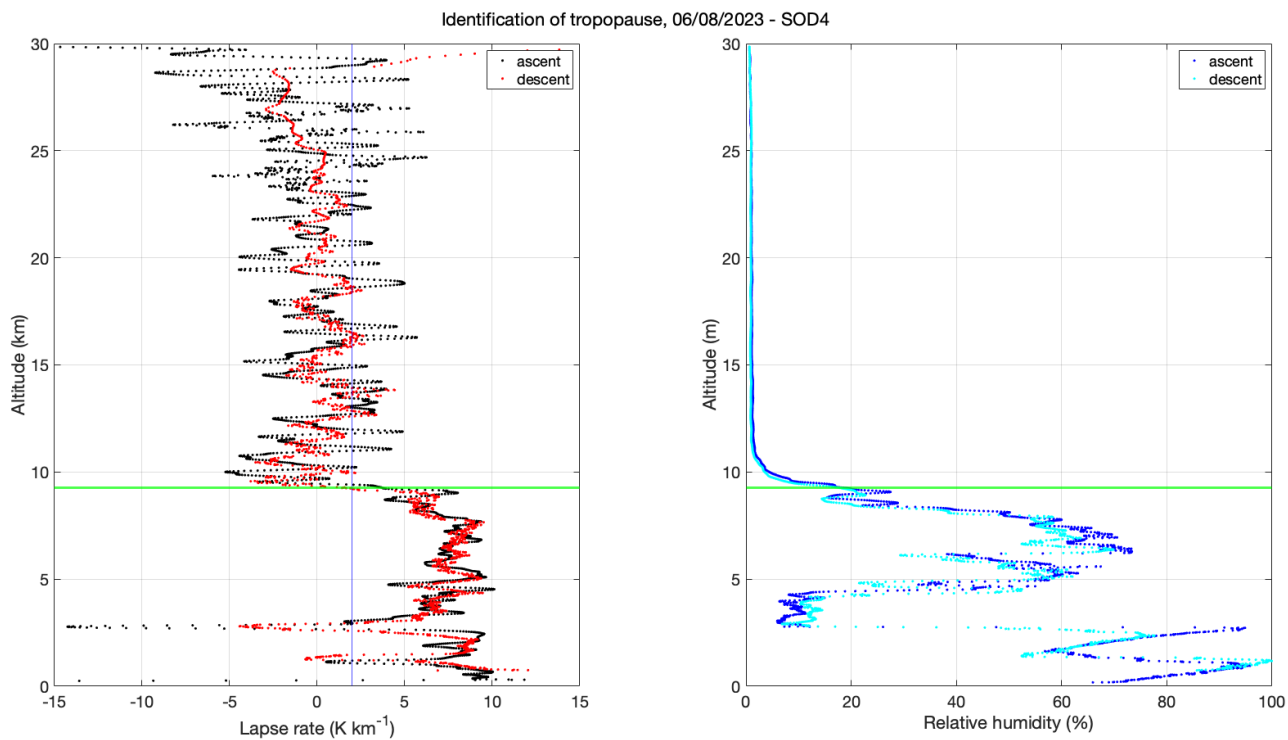

75 **Figure S14: identification of the tropopause height for SOD4 (9.25 km).**



Identification of tropopause, 08/08/2023 - SOD5

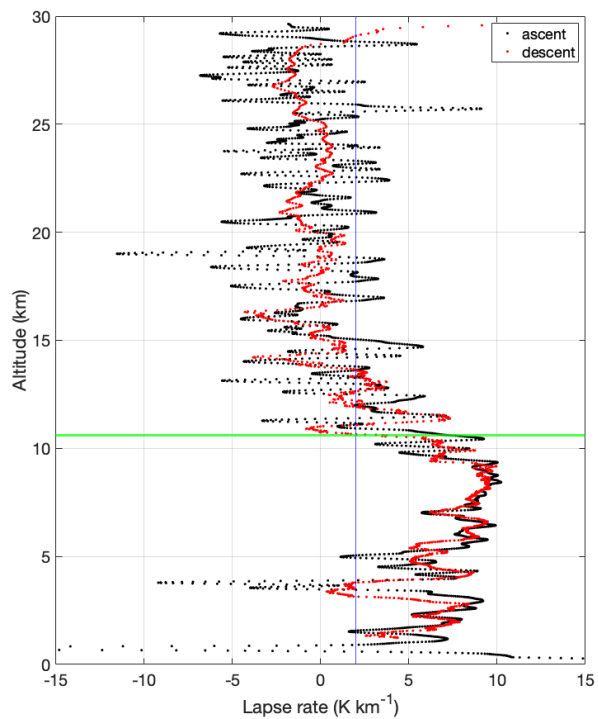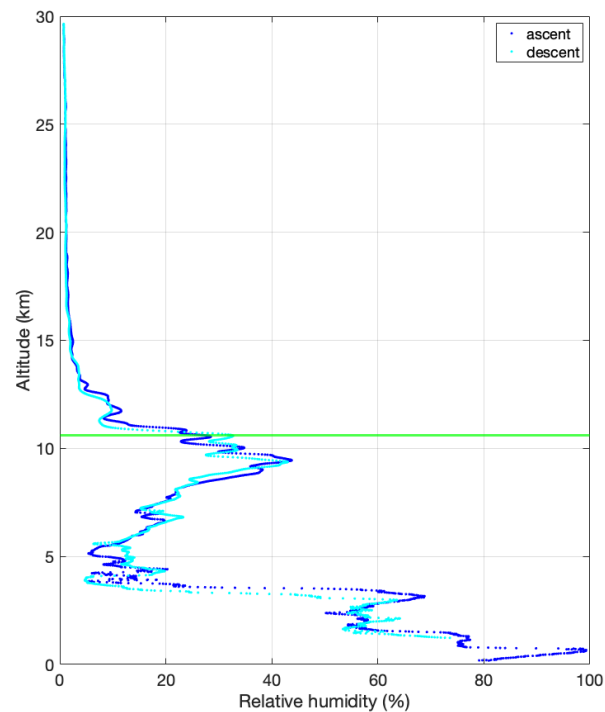

Figure S15: identification of the tropopause height for SOD5 (10.59 km).

S4 Correlation between CH<sub>4</sub> and N<sub>2</sub>O in the observed profiles

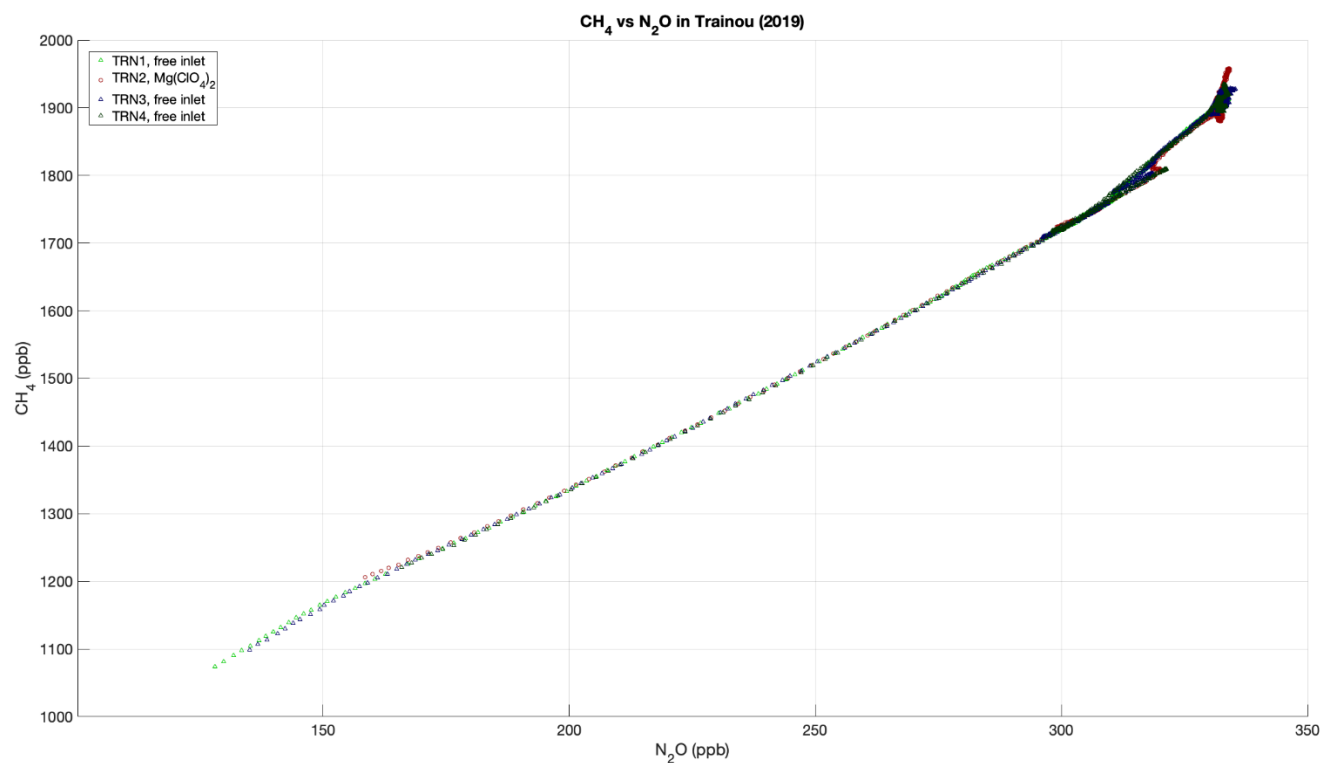

80    Figure S16: correlation between CH<sub>4</sub> and N<sub>2</sub>O in the Trainou campaign (2019).

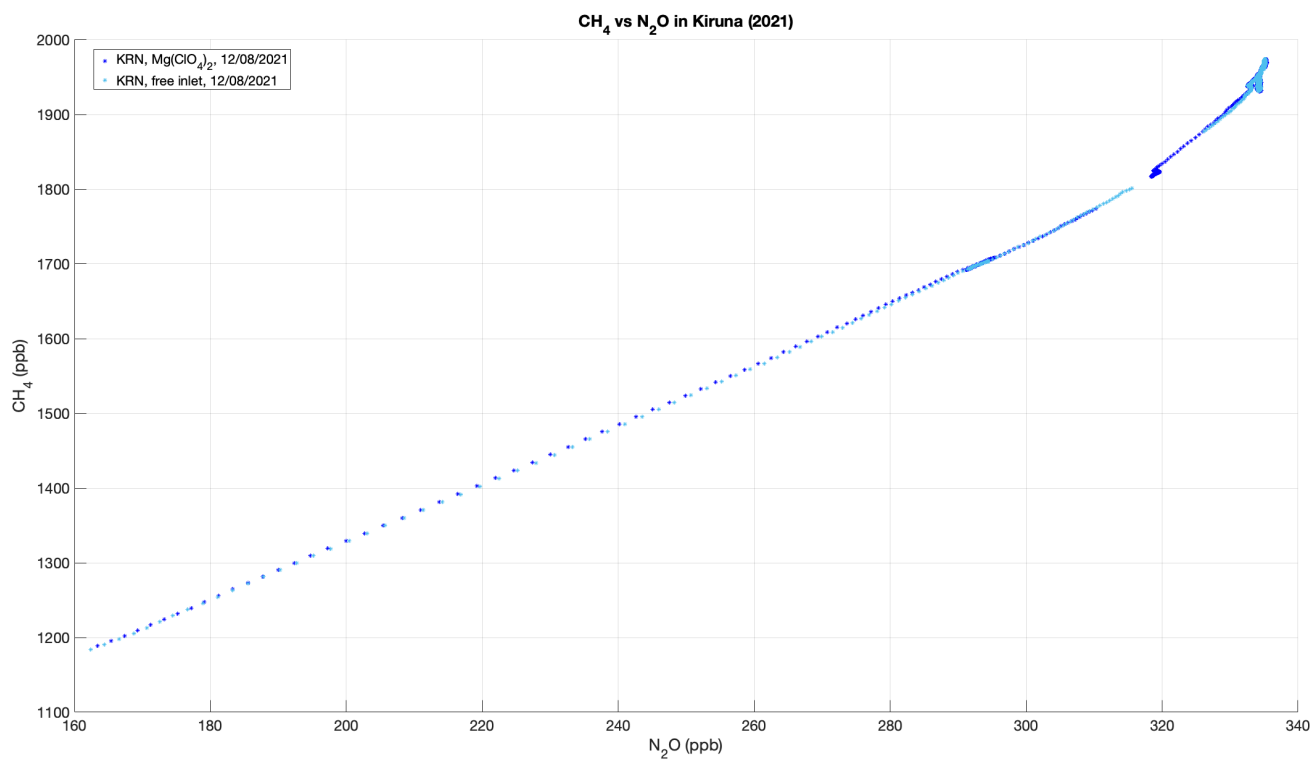

**Figure S17: correlation between CH<sub>4</sub> and N<sub>2</sub>O in the Kiruna campaign (2021).**

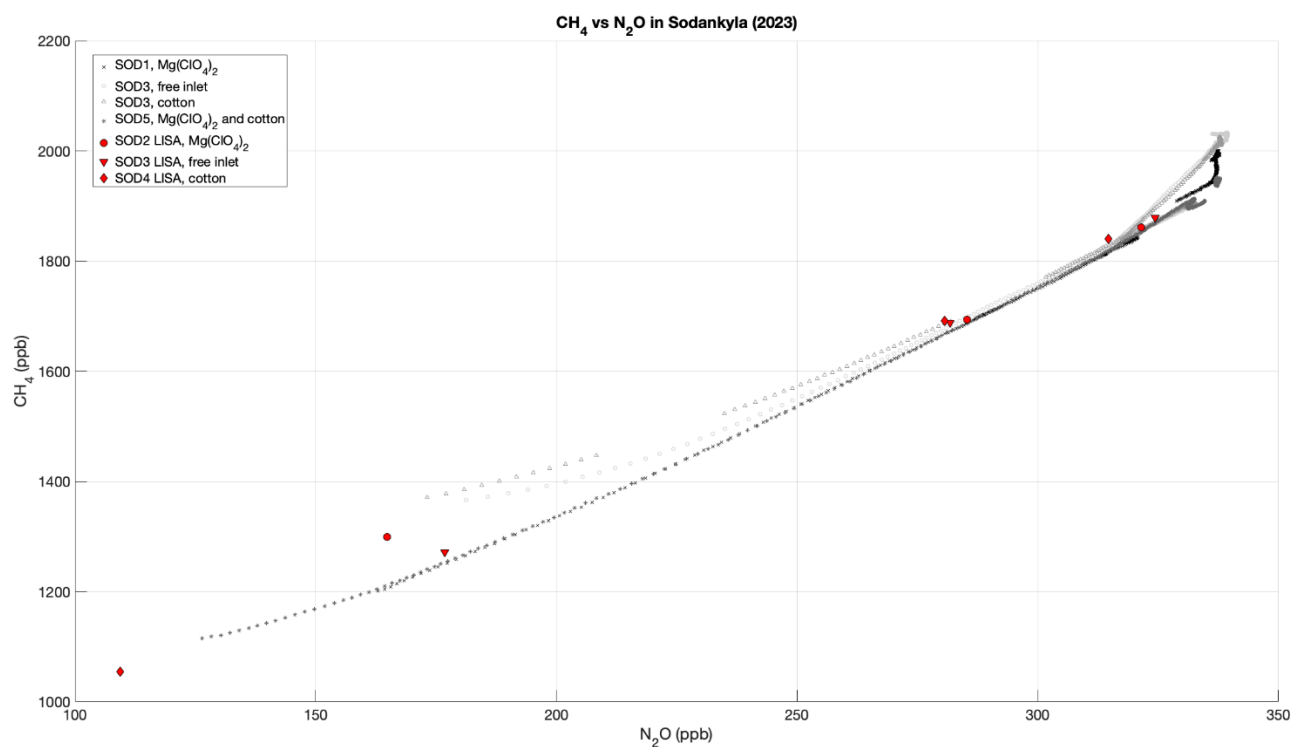

**Figure S18: correlation between CH<sub>4</sub> and N<sub>2</sub>O in the Sodankylä campaign (2023).**
